# Supplementary material for: Effects of iron substitution and anti-site disorder on crystal structures, vibrational, optical and magnetic properties of double perovskites Sr2(Fe1−xNix)TeO6
Source: Royal Society of Chemistry journal article supplement (doi:10.1039/d2dt02447k), 2022-01-01
Supplement: d2dt02447k1.pdf [file d2dt02447k1.pdf]

## Electronic supplementary information:

### Experimental:

The Goldschmidt tolerance factor for a double perovskite,  $A_2BB'O_6$  as follows:

$$t = \frac{r_A + r_O}{\sqrt{2}\left(\frac{r_B}{2} + \frac{r_{B'}}{2} + r_O\right)} \quad (1)$$

where  $r_A$ ,  $r_B$ ,  $r_{B'}$ , and  $r_O$  are the ionic radii as taken from Shannon [1] for the  $A$ ,  $B$ ,  $B'$  cations and oxygen anions, respectively. This parameter provides a measure of how well the  $A$ -site cations fits the twelve-fold (cubo-octahedral) coordination space within the corner-shared octahedral network formed by the  $B$ -site cations. It is well known that this tolerance factor depends on the size of ions located in  $A$  and  $B$  sites of double-perovskite structure. If the size of the  $A$  cation is greater than the size of the  $B$  cation, this factor is  $> 1$ . In contrast,  $t < 1$  when the size of  $A$  cations is smaller than  $B$  cations. For  $t = 1$  the structure is cubic [2].

The optical properties of the materials were studied by diffuse reflectance UV/Vis spectroscopy (DR-UV/Vis) with a Shimadzu, UV2600 spectrometer. Spectra were recorded over a wavelength range of 200 - 850 nm at room temperature. Barium sulfate was used as a standard. The band-gap energy was obtained from the reflectance spectra by employing Tauc's method [3] to transform the function:

$$\alpha(\lambda) \approx B \left(\frac{hc}{\lambda} - E_g\right)^n \quad (2)$$

into the Kubelka - Munk function [4] to obtain the function  $F(R)$ , which is related to the absorption and scattering coefficients  $k(\lambda)$  and  $s(\lambda)$ :

$$F(R) = \frac{[1 - R(\lambda)]^2}{2R(\lambda)} = \frac{k(\lambda)}{s(\lambda)} \quad (3)$$

where  $F(R)$  is the Kubelka-Munk absorption, ' $R$ ' is the diffuse reflectance,  $h$  is the Planck constant,  $c$  is the speed of light,  $\lambda$  is the wavelength of the impinging light, and  $E_g$  is the optical band gap in eV,  $B$  is a proportionality constant. The exponent  $n$  is the type of transition:  $n = 2$  for indirect transitions,  $n = 1/2$  for direct transitions [3 - 5]. Nevertheless, from such a treatment it can often be difficult to determine the nature of the optical transition and therefore an accurate band gap energy. An alternative is to apply a derivation of absorption spectrum fitting (DASF) [6] without knowing if the transition is direct or indirect, which is expressed by the following equation:

$$A(\lambda) = D\lambda \left(\frac{1}{\lambda} - \frac{1}{\lambda_g}\right)^n \quad (4)$$

where  $D = B(hc)^{n-1}z/2.303$ ,  $z$  is thickness of the reflecting layer,  $A$  is the absorbance at a wavelength  $\lambda$ ,  $\lambda_g$  is the wavelength for corresponding band-gap energy. We can also use this Equation (3) in the followed form:

$$\frac{d[\ln\left(\frac{A(\lambda/\lambda)}{A(\lambda_g/\lambda_g)}\right)]}{d(1/\lambda)} = \frac{n}{\left(\frac{1}{\lambda} - \frac{1}{\lambda_g}\right)} \quad (5)$$

In this method, the Kubelka-Munk function  $F(R)$  (equation 3) is assumed to be correlated to the absorption spectrum  $A(\lambda)$  [ $A(\lambda) = F(R)$ ], that is by means of the scattering coefficient  $s(\lambda)$  which can be expressed as follow  $s(\lambda) = s$  (this coefficient can be independent of the wavelength). Consequently, the obtained data from the transformed reflectance of Kubelka-Munk function can be utilized to estimate transition wavelength [7].

The equation (5) helps to calculate the absolute value of band-gap energy  $E_g$ , which could be expressed

by:  $E_g = \frac{hc}{\lambda_g} = \frac{1239.81}{\lambda_g} [eV]$  [8]. The idea is to get rid of the fixed transition exponent "n" by calculating the derivative of the absorption spectrum [8]. To its original successful use with thin films, this method was recently utilized for powders to determine the band gap energy [8]. The experimental work described herein demonstrates the possibility of employing the Reflectance-Absorption-Tauc-DASF (RATD) method [6], for deriving the transition types and band-gap energies of a series of isostructural compounds with varying composition.

## References:

- [1]. R. D. Shannon, (1976). *Acta Crystallogr.* A32, 75.
- [2]. Mailadil T. Sebastian, (2008). *Dielectric Materials for Wireless Communication*, 161-203.
- [3]. J. Tauc, R. Grigorovici, A. Vanu, (1966). *Phys Status Solidi B* 15:627–637.
- [4]. P. Kubelka (1931). *Z Tech Phys* 12:593–601.
- [5]. R. Köferstein, L. Jäger, S. G. Ebbinghaus, (2013). *Solid State Ion.* 249–250, 1–5.
- [6]. D. Souril, Z. E. Tahan, (2015). *Appl Phys B* 119:273–279.
- [7]. M. Curti, A. Kirsch, L. I. Granone, F. Tarasi, G. López-Robledo, D.W. Bahnemann, M. M. Murshed, T. M. Gesing, and C. B. Mendive, *ACS Catal.*, (2018), 8, 9, 8844–8855.
- [8]. K. Ghosh, M. M. Murshed, M. Fischer and T. M. Gesing, *J. Am. Ceram. Soc.*, (2022), 105, 1, 728-741.
